# Supplementary material
Source: publisher figshare collection journal article supplement (https://acs.figshare.com/ndownloader/files/4493050)
Supplement: Supplementary file 1 [file 4493050]

## Hindered solute transport

Hydrodynamic coefficients  $K_{i,d}$  and  $K_{i,c}$  introduced in eq 1 account for the effect of the finite pore size on diffusion and convection through pores. Several approximate relations of these hydrodynamic factors are available in the literature.<sup>45</sup> Analytical relations derived by Bungay and Brenner are among the most interesting ones as they were established for the entire range of solute to pore size ratios<sup>45</sup>

$$K_{i,d} = \frac{6\pi}{K_{i,t}} \quad (\text{I})$$

$$K_{i,c} = \frac{(2 - (1 - \lambda_i)^2)K_{i,s}}{2K_{i,t}} \quad (\text{II})$$

where  $K_{i,t}$  and  $K_{i,s}$  are defined as

$$K_{i,t} = \frac{9}{4}\pi^2\sqrt{2}(1 - \lambda_i)^{-5/2} \left[ 1 + \sum_{n=1}^2 a_n (1 - \lambda_i)^n \right] + \sum_{n=0}^4 a_{n+3} \lambda_i^n \quad (\text{III})$$

$$K_{i,s} = \frac{9}{4}\pi^2\sqrt{2}(1 - \lambda_i)^{-5/2} \left[ 1 + \sum_{n=1}^2 b_n (1 - \lambda_i)^n \right] + \sum_{n=0}^4 b_{n+3} \lambda_i^n \quad (\text{IV})$$

with  $a_1 = -73/60$ ,  $a_2 = 77.293/50.400$ ,  $a_3 = -22.5083$ ,  $a_4 = -5.6117$ ,  $a_5 = -0.3363$ ,  $a_6 = -1.216$ ,  $a_7 = 1.647$ ,  $b_1 = 7/60$ ,  $b_2 = -2.227/50.400$ ,  $b_3 = 4.0180$ ,  $b_4 = -3.9788$ ,  $b_5 = -1.9215$ ,  $b_6 = 4.392$ ,  $b_7 = 5.006$  and  $\lambda_i = r_{i,Stokes} / r_p$  where is  $r_{i,Stokes}$  stands for the Stokes radius of the ion  $i$  defined as follows

$$r_{i,Stokes} = \frac{k_B T}{6\pi\eta D_i} \quad (\text{V})$$

where  $k_B$  is the Boltzmann constant and  $\eta$  is the solution viscosity.
